# Supplementary figures and images for: Relationship Between Pregnancy Complications and Psychiatric Disorders: A Population-Based Study With a Matched Control Group
Source: Atypon-hosted journal article supplement (doi:10.1176/appi.ps.201700097), 2017-11-15

**Online Appendix. Study Sample Selection**

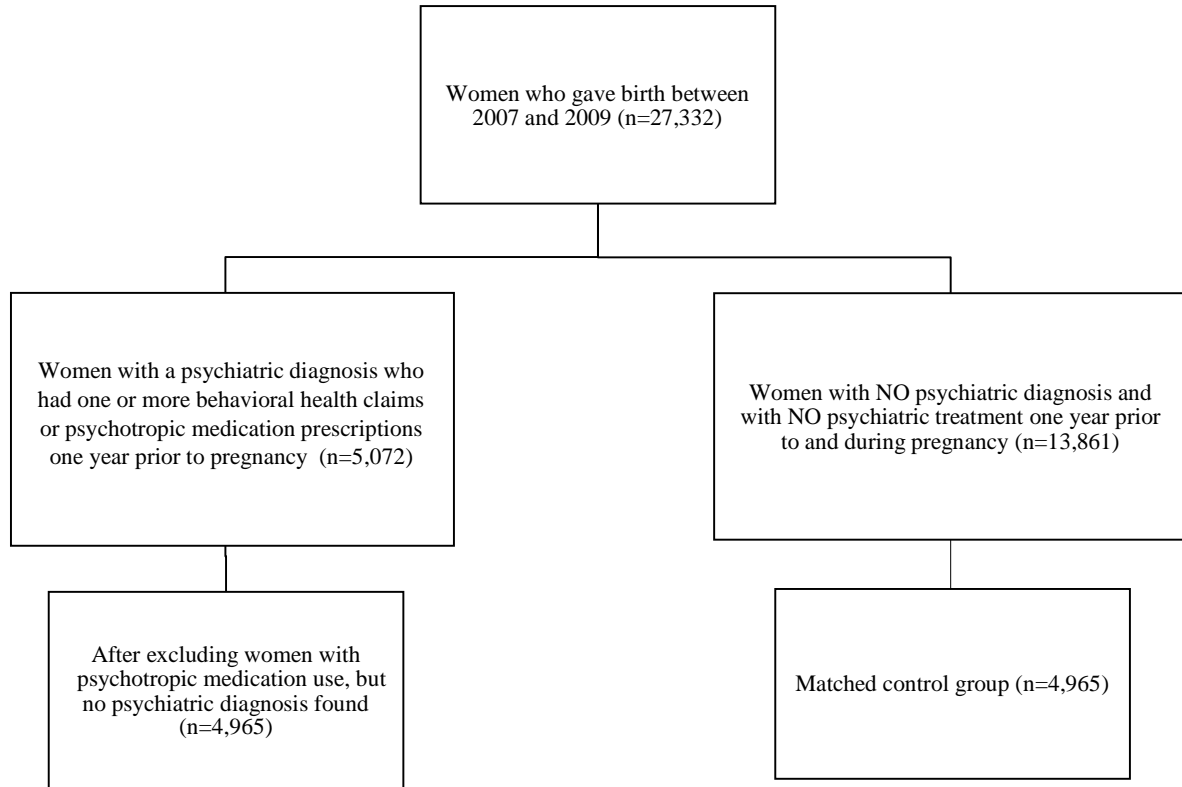

Supplement: appi.ps.201700097.ds001.pdf [file appi.ps.201700097.ds001.pdf]
